# Supplementary material
Source: PubMed Central journal article supplement (PMC3907115)
Supplement: NIHMS546008-supplement-All_Supplmentary_Figures_and_Table.pdf [file NIHMS546008-supplement-All_Supplmentary_Figures_and_Table.pdf]

# Supp. Fig S1. Generation of *P. yoelii* ICP-myc parasite line and its co-localization with *P. falciparum* and *P. yoelii* ICP antibodies.

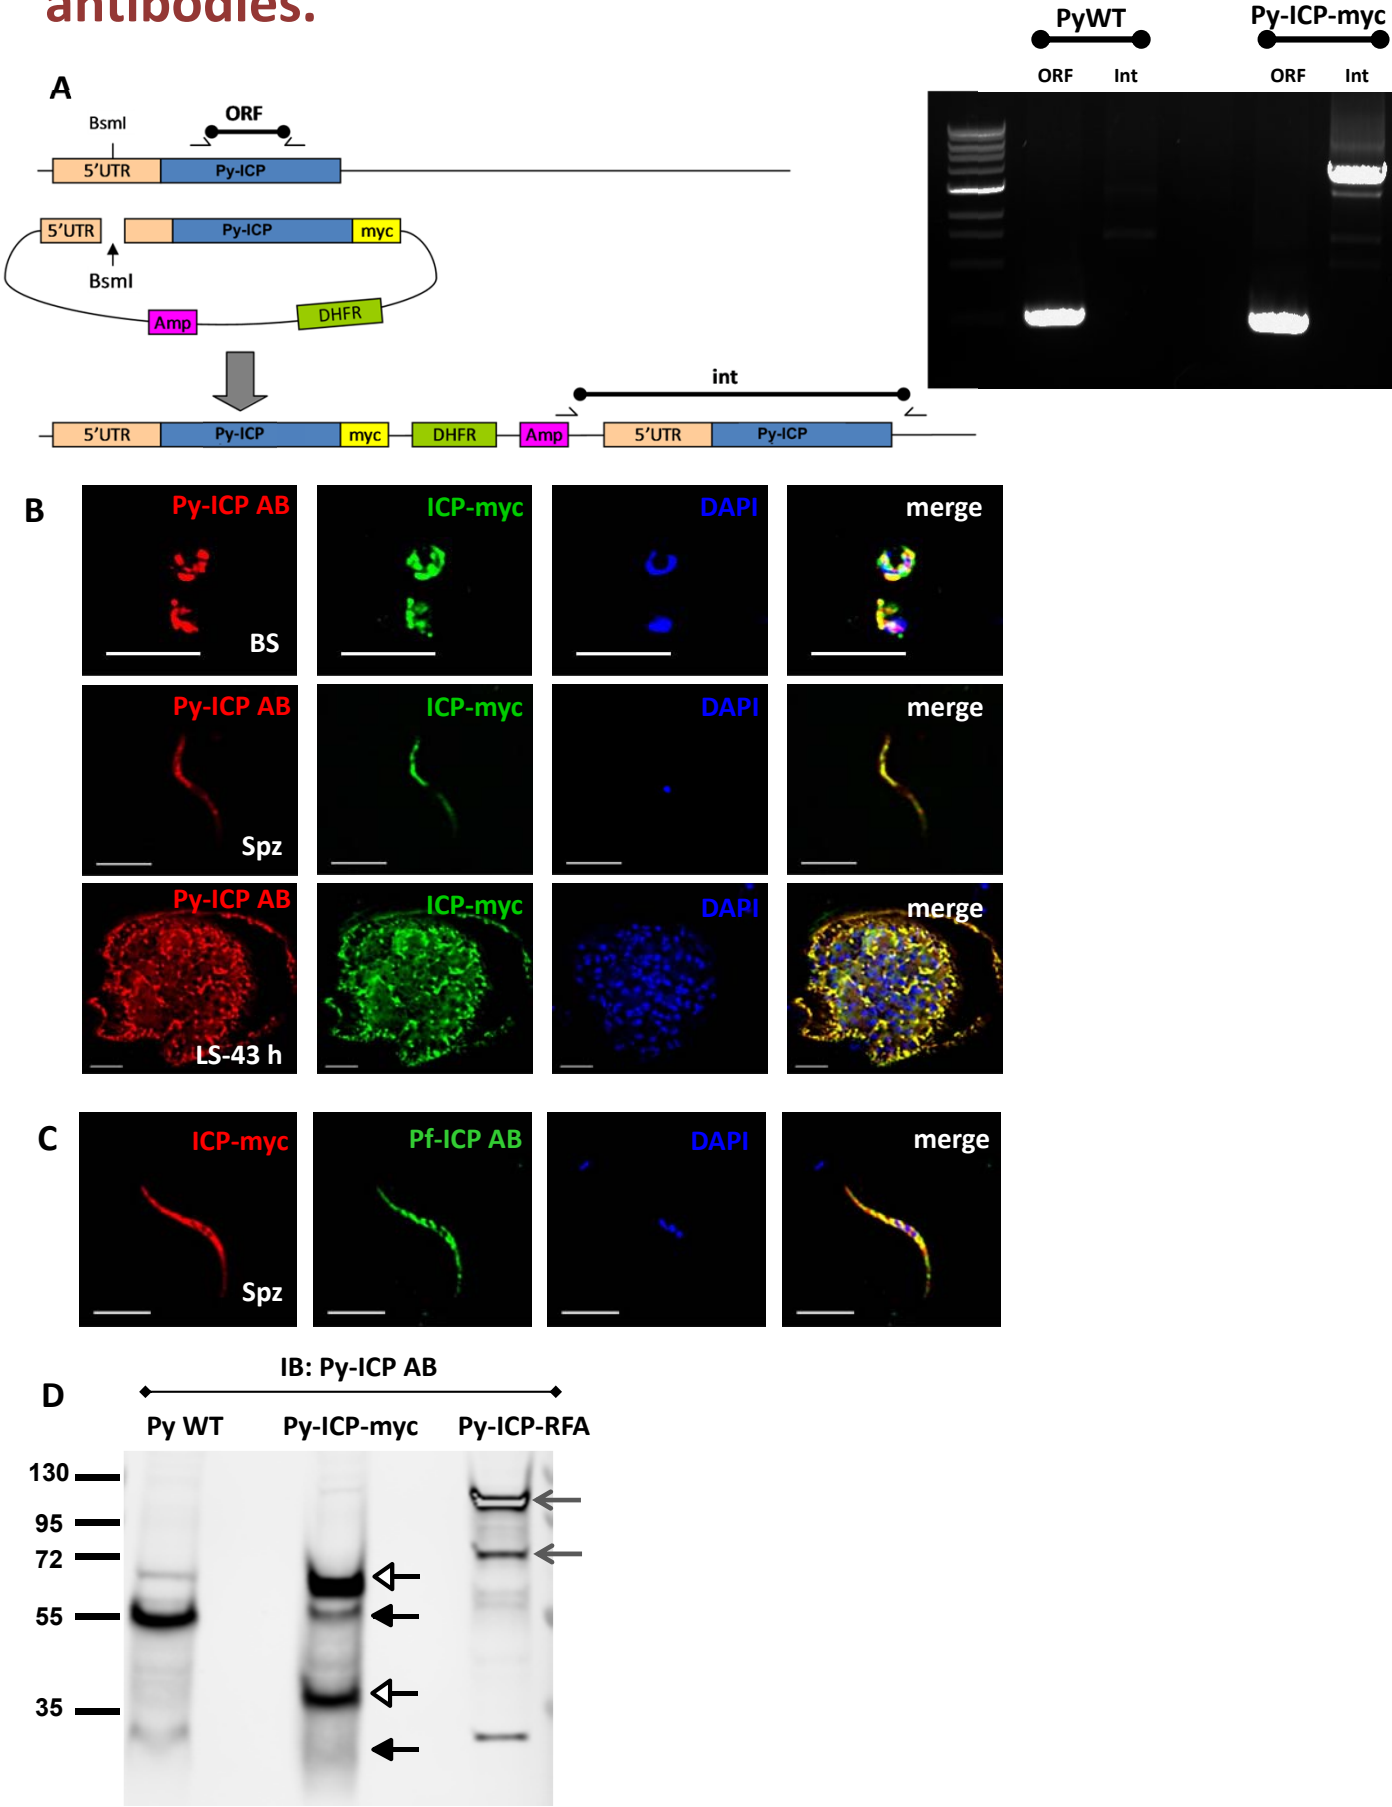

# Supp. Fig S2.

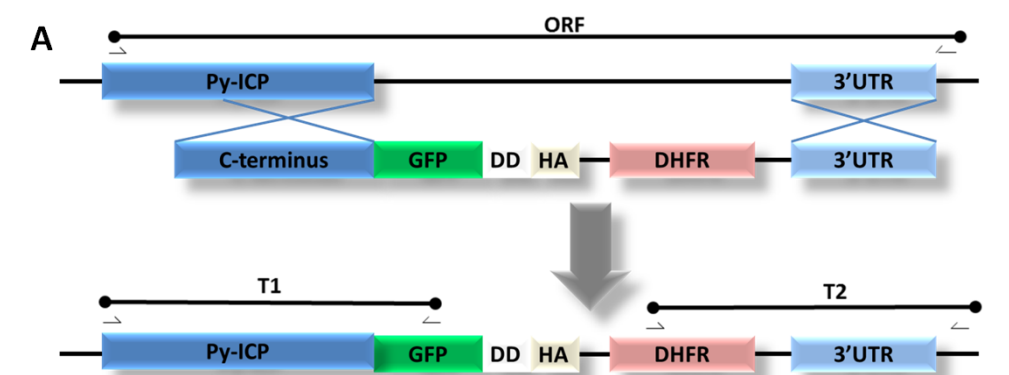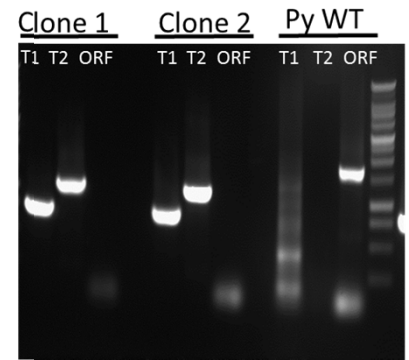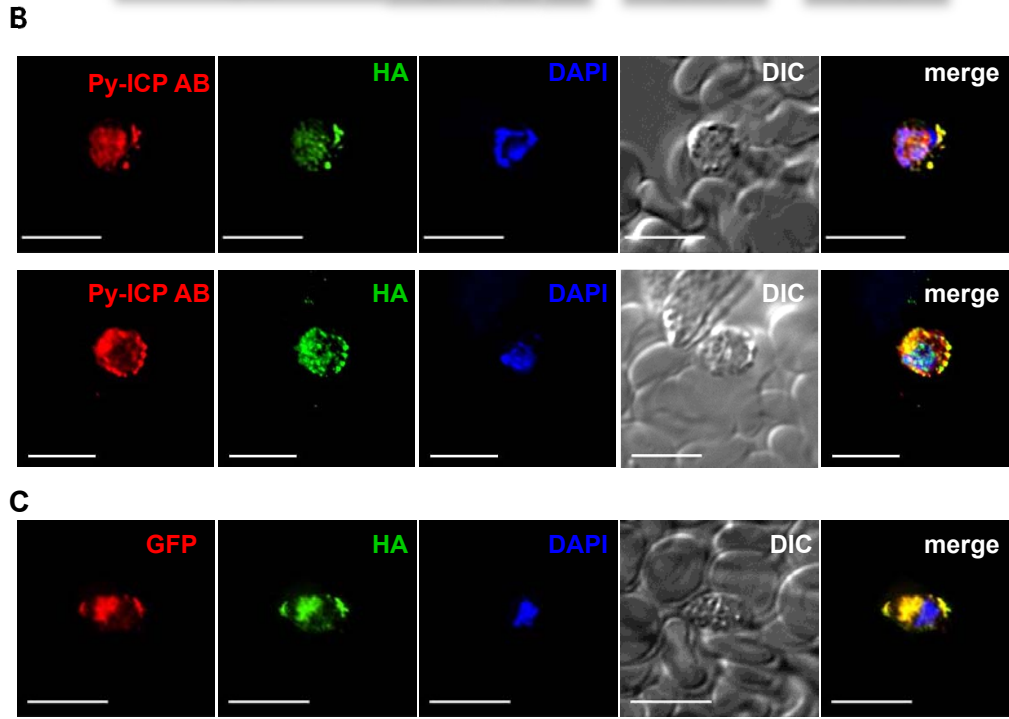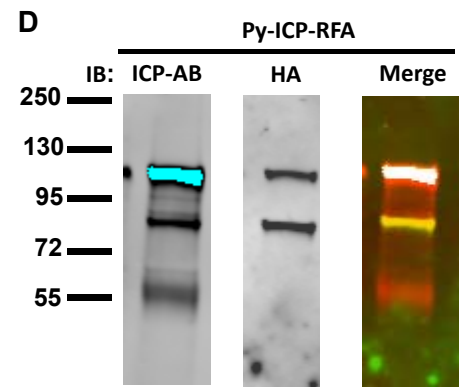

# Supp. Fig S3.

**A** MKSITFFVFN ICSILALLSH CEDRDLYSFD IVNETSWLKI AKKIFKGKSP SNFTIIPFNN TGSSDNEGD KEESVLLIRK KIKSNTKHGS  
NIISDDSVND DISNLSLNST ASNFSDNNEE IEDNQKYPTT SYN SFNDPNS NISFNEESEF SEIDSESLE NNIK DINIK N NLEENNTMNE  
IDNKVDSKYE LTGDEKCGNS LKLGNISNQT SQETINQSLS VGETFCIDFE ANAGTGYIWA LLGVHKNEPI INPENFPTKL TKKPYFSEEI  
SVTQPKRYKI DEHDSSKNVD KENESQDQKE SDSKPKKPQM HLLGGPDNMR SVIKGHKAGK YYIVYSYRPF SPTSGANTK  
ILYVTVQ

**B** MKSITFFVFN ICSILALLSH CEDRDLYSFD IVNETSWLKI AKKIFKGKSP SNFTIIPFNN TGSSDNEGD KEESVLLIRK KIKSNTKHGS  
NIISDDSVND DISNLSLNST ASNFSDNNEE IEDNQKYPTT SYN SFNDPNS NISFNEESEF SEIDSESLE NNIK DINIK N NLEENNTMNE  
IDNKVDSKYE LTGDEKCGNS LKLGNISNQT SQETINQSLS VGETFCIDFE ANAGTGYIWA LLGVHKNEPI INPENFPTKL TKKPYFSEEI  
SVTQPKRYKI DEHDSSKNVD KENESQDQKE SDSKPKKPQM HLLGGPDNMR SVIKGHKAGK YYIVYSYRPF SPTSGANTK  
ILYVTVQ

## Supp. S4 Localization of Py-ICP in the midgut.

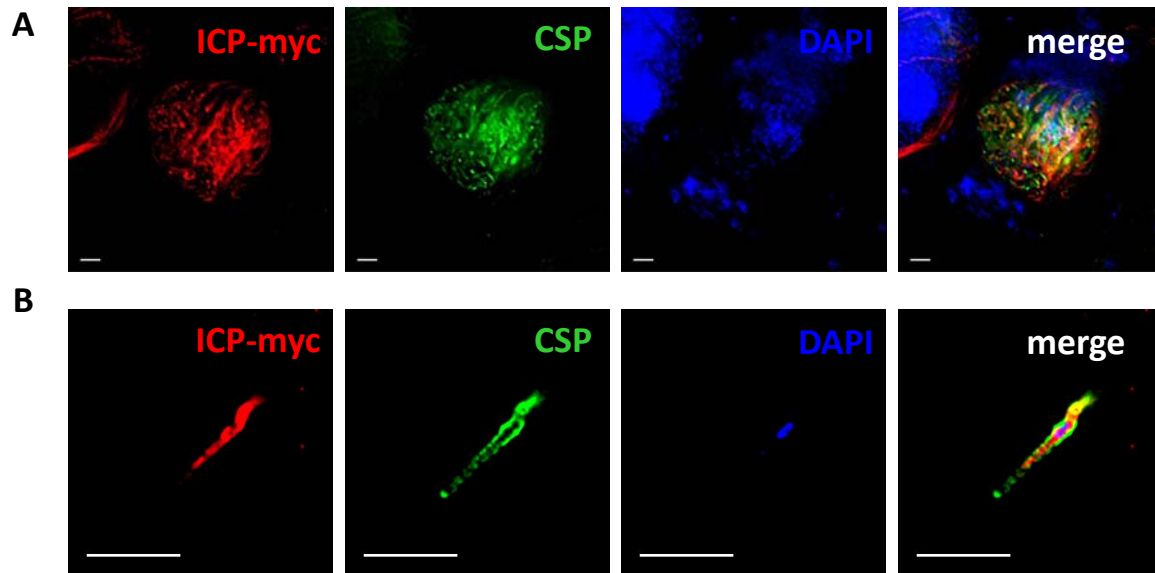

**Supp. Figure S5. ICP localizes to the interior of early liver stage but is released during late liver stage *in vitro*.**

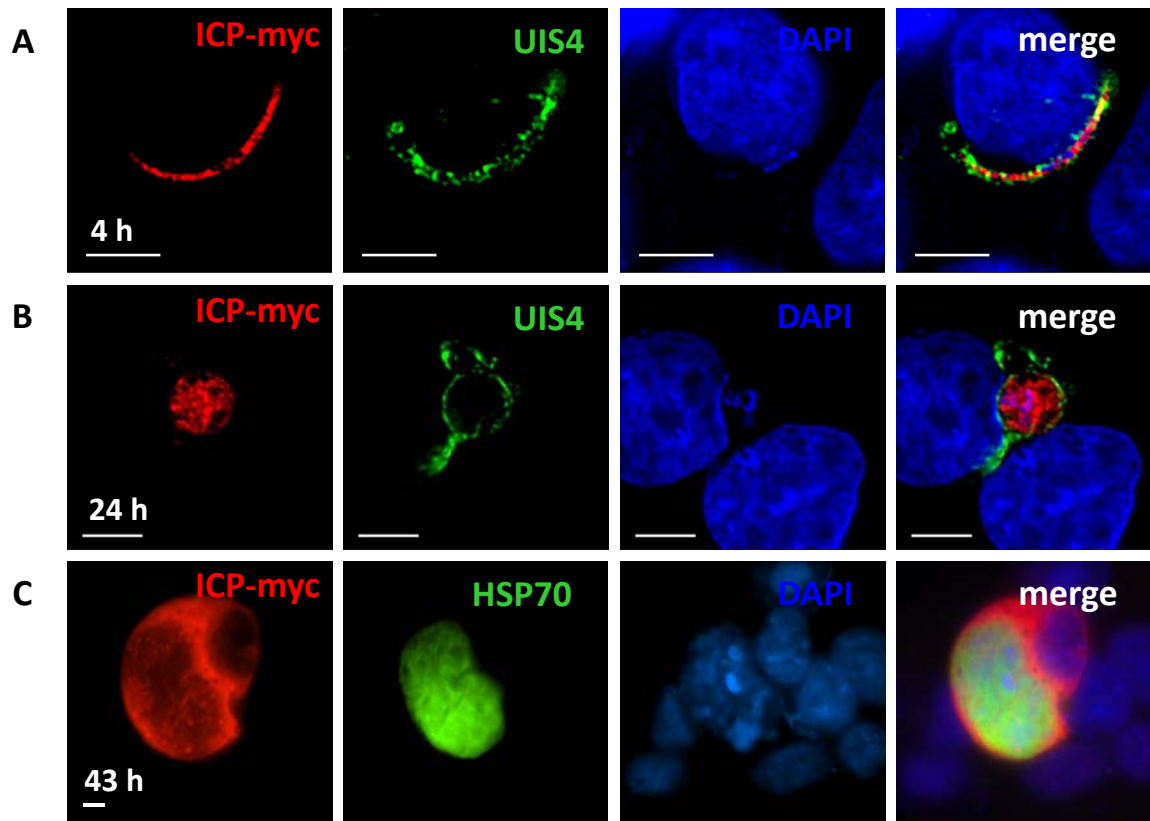

# Supp. Figure S6. *P. yoelii* ICP is essential in blood stage

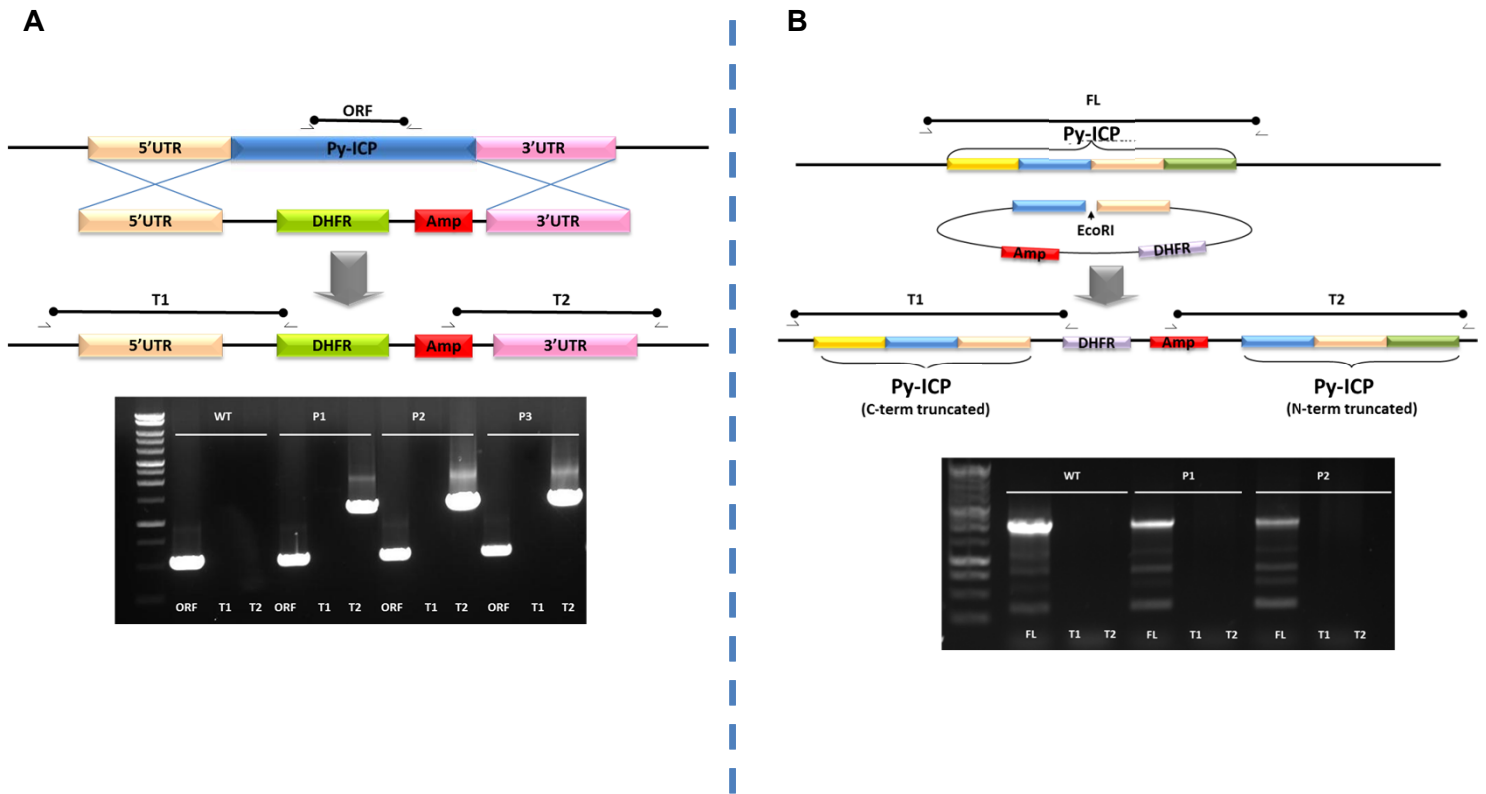

# Supp. Figure S7. Western blot analysis on ICP pull down experiments

**A**

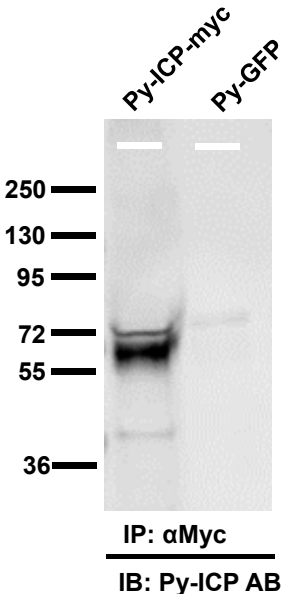

**B**

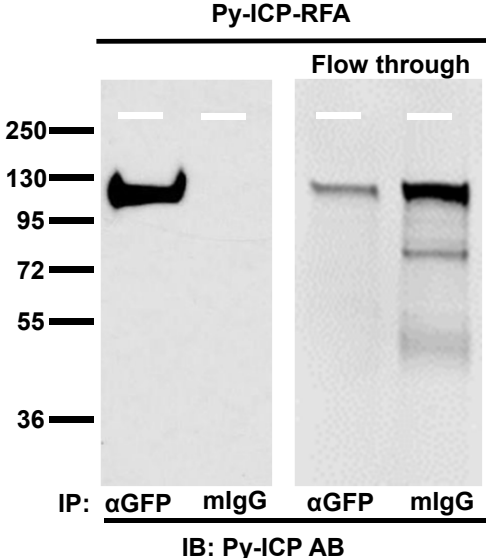

**Table S1. Co-immunoprecipitation experiments.**

Five independent co-immunoprecipitation experiments were performed using different parasite lines probed with different antibodies. Proteins observed in any of the four negative controls were discounted.

| <b>Pull down experiment<br/>(parasite line/antibody probe)</b> | <b>Negative controls<br/>(parasite line/antibody probe)</b> |
|----------------------------------------------------------------|-------------------------------------------------------------|
| Py-ICP-myc / myc (two independent experiments)                 | Py GFP / myc<br>Py WT / GFP                                 |
| Py-ICP-RFA / GFP (three independent experiments)               | Py-ICP-RFA / mouse IgG<br><br>Py GFP / GFP                  |

---
